# Supplementary material
Source: HighWire-hosted journal article supplement (http://bmjopenquality.bmj.com/highwire/filestream/143294/field_highwire_adjunct_files/0/bmjoq-2021-001774supp001_data_supplement.pdf)
Supplement: bmjoq-2021-001774supp001_data_supplement.pdf [file bmjoq-2021-001774supp001_data_supplement.pdf]

Supplemental materials

Appendix1

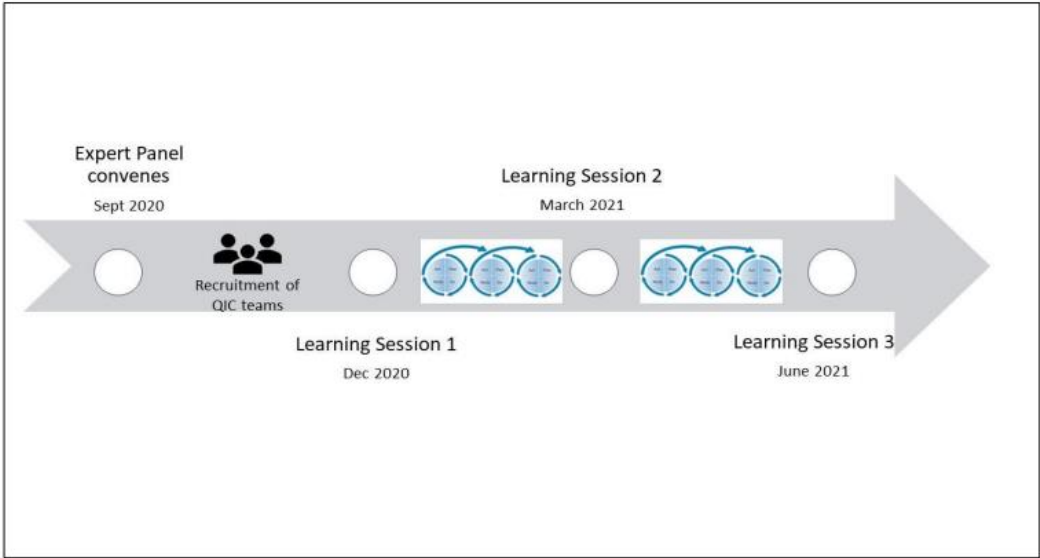

**Figure 1A: Timeline presenting the activities of the STAAR-SA Quality Improvement Collaborative (authors’ illustration)**

**Table 3A: Overview of the aims of the STAAR-SA Quality Improvement Collaborative teams**

| Team                                                                                                               | Aim of project                                                                                                                       |
|--------------------------------------------------------------------------------------------------------------------|--------------------------------------------------------------------------------------------------------------------------------------|
| Virtual support for patients from residential care homes<br>(3 Local Health Network teams which formed 1 QIC team) | Reducing unplanned admissions/re-presentations to hospital for residents of residential care homes using virtual support             |
| Geriatric Evaluation Management (GEM) ward to residential care home                                                | Improving transition of care from hospital to residential care for new residents with behavioural/psychological symptoms of dementia |
| End of Life Care                                                                                                   | Improving End of Life Care planning for patients transitioning from hospital to residential care facilities for the first time       |
| Home rehabilitation                                                                                                | Reducing unplanned up-transfers for patients on Home Rehabilitation                                                                  |

| Team                                                  | Aim of project                                                                                                                                                                                          |
|-------------------------------------------------------|---------------------------------------------------------------------------------------------------------------------------------------------------------------------------------------------------------|
| ‘Something missing in the middle’                     | Improving transition from hospital to home for patients at high risk of representation due to their non-clinical care needs (e.g., Groceries, social support)                                           |
| Pharmacy High Risk Medication Review                  | Improving identification of patients at risk of representation to hospital due to high-risk medications, and developing pathways to facilitate medication review in the community                       |
| Country Health Consumer Led health in-home monitoring | Improving identification and monitoring of consumers receiving community home care packages who are at risk of presenting/representing to hospital due to their chronic condition or functional decline |

Note: GEM, Geriatric Evaluation and Management, QIC, quality improvement collaborative.

## Questionnaires

### Evaluation of quality improvement collaborative

**1. What was your role in the Quality Improvement Collaborative?**

- ☐ Project Lead
- ☐ Project Team Member

**2. Which Quality Improvement Project were you involved with?**

Ans:

**3. Please rate your level of agreement with the following statement: Through participating in the Quality Improvement Collaborative, I have a better understanding of other organisations that provide care for older people in South Australia.**

- ☐ Strongly agree
  - ☐ Agree
  - ☐ Neither agree nor disagree
  - ☐ Somewhat disagree
  - ☐ Strongly disagree
- 

**4. Participating in the Quality Improvement Collaborative has assisted me to establish or build on relationships with other key stakeholders who provide care for older people in South Australia.**

- ☐ Strongly agree
  - ☐ Somewhat agree
  - ☐ Neither agree nor disagree
  - ☐ Somewhat disagree
  - ☐ Strongly disagree
- 

**5. If so, are you likely to maintain these relationships after the Quality Improvement Collaborative ends?**

- ☐ Probably yes
  - ☐ Definitely yes
  - ☐ Possibly
  - ☐ Probably not
  - ☐ Definitely not
- 

**6. I believe my skills in being able to 'do' quality improvement activities have improved through being involved in this project.**

- ☐ Strongly agree
  - ☐ Agree
  - ☐ Neither agree nor disagree
  - ☐ Disagree
  - ☐ Strongly disagree
-

**7. Did you find the contact from the Quality Improvement Collaborative Network Manager helpful?**

- ☐ Yes - please explain why below

---

- ☐ No - please explain why below

---

**This question relates to your quality improvement project.**

**8. To what extent did your Team achieve the stated aims of your project?**

- ☐ We did even better than we had expected
- ☐ We achieved our aim as we expected
- ☐ We got close to our aim, but achieved less than expected
- ☐ We did not achieve anything
- ☐ Things got worse
- ☐ Don't know

---

**9. To what extent did outcomes improve on your Team's selected measures**

- ☐ Improved significantly
- ☐ Improved slightly
- ☐ No measurable change
- ☐ Worse
- ☐ Much worse
- ☐ Don't know

---

**10. How successful do you think your Team has been at implementing quality improvements?**

- ☐ Very successful
  - ☐ A little bit successful
  - ☐ Not successful
- 

**11. Have you used the skills that you developed through participation in the Quality Improvement Collaborative in other projects?**

- ☐ Yes
  - ☐ No
- 

**Any further comments or feedback about your participation in the QIC?**

---

---

---

**Footnote:**

Questions 3,4,5,7 assess whether the quality improvement collaborative improved networks between services.

Questions 6,11 assess whether the quality improvement collaborative built capacity in the workforce to undertake quality improvement projects.

Questions 8,9,10 assess whether the quality improvement collaborative improved the quality of care for older South Australians at the time of transition.

Q1. BEFORE working with the STAAR-SA project, please indicate your professional relationship with the following organisations:

|            | I knew very little about this organisation | I knew a bit about but did not talk directly | I spoke with people from this organisation regularly | I work for this organisation |
|------------|--------------------------------------------|----------------------------------------------|------------------------------------------------------|------------------------------|
| [redacted] | <input type="checkbox"/>                   | <input type="checkbox"/>                     | <input type="checkbox"/>                             | <input type="checkbox"/>     |
| [redacted] | <input type="checkbox"/>                   | <input type="checkbox"/>                     | <input type="checkbox"/>                             | <input type="checkbox"/>     |
| [redacted] | <input type="checkbox"/>                   | <input type="checkbox"/>                     | <input type="checkbox"/>                             | <input type="checkbox"/>     |
| [redacted] | <input type="checkbox"/>                   | <input type="checkbox"/>                     | <input type="checkbox"/>                             | <input type="checkbox"/>     |
| [redacted] | <input type="checkbox"/>                   | <input type="checkbox"/>                     | <input type="checkbox"/>                             | <input type="checkbox"/>     |
| [redacted] | <input type="checkbox"/>                   | <input type="checkbox"/>                     | <input type="checkbox"/>                             | <input type="checkbox"/>     |
| [redacted] | <input type="checkbox"/>                   | <input type="checkbox"/>                     | <input type="checkbox"/>                             | <input type="checkbox"/>     |
| [redacted] | <input type="checkbox"/>                   | <input type="checkbox"/>                     | <input type="checkbox"/>                             | <input type="checkbox"/>     |
| [redacted] | <input type="checkbox"/>                   | <input type="checkbox"/>                     | <input type="checkbox"/>                             | <input type="checkbox"/>     |
| [redacted] | <input type="checkbox"/>                   | <input type="checkbox"/>                     | <input type="checkbox"/>                             | <input type="checkbox"/>     |
| [redacted] | <input type="checkbox"/>                   | <input type="checkbox"/>                     | <input type="checkbox"/>                             | <input type="checkbox"/>     |
| [redacted] | <input type="checkbox"/>                   | <input type="checkbox"/>                     | <input type="checkbox"/>                             | <input type="checkbox"/>     |

Q2. Please add extra information here if you need to clarify your response:

-----  
*Note that we have blanked out the names of the individual organisations for their anonymity.*

Q3. WITHIN the STAAR-SA work please indicate professional relationships with the following services

|            | I know very little about this organisation | I learnt more about but did not talk directly | I spoke with people from this organisation | I work for this organisation |
|------------|--------------------------------------------|-----------------------------------------------|--------------------------------------------|------------------------------|
| [REDACTED] | <input type="checkbox"/>                   | <input type="checkbox"/>                      | <input type="checkbox"/>                   | <input type="checkbox"/>     |
| [REDACTED] | <input type="checkbox"/>                   | <input type="checkbox"/>                      | <input type="checkbox"/>                   | <input type="checkbox"/>     |
| [REDACTED] | <input type="checkbox"/>                   | <input type="checkbox"/>                      | <input type="checkbox"/>                   | <input type="checkbox"/>     |
| [REDACTED] | <input type="checkbox"/>                   | <input type="checkbox"/>                      | <input type="checkbox"/>                   | <input type="checkbox"/>     |
| [REDACTED] | <input type="checkbox"/>                   | <input type="checkbox"/>                      | <input type="checkbox"/>                   | <input type="checkbox"/>     |
| [REDACTED] | <input type="checkbox"/>                   | <input type="checkbox"/>                      | <input type="checkbox"/>                   | <input type="checkbox"/>     |
| [REDACTED] | <input type="checkbox"/>                   | <input type="checkbox"/>                      | <input type="checkbox"/>                   | <input type="checkbox"/>     |
| [REDACTED] | <input type="checkbox"/>                   | <input type="checkbox"/>                      | <input type="checkbox"/>                   | <input type="checkbox"/>     |
| [REDACTED] | <input type="checkbox"/>                   | <input type="checkbox"/>                      | <input type="checkbox"/>                   | <input type="checkbox"/>     |
| [REDACTED] | <input type="checkbox"/>                   | <input type="checkbox"/>                      | <input type="checkbox"/>                   | <input type="checkbox"/>     |
| [REDACTED] | <input type="checkbox"/>                   | <input type="checkbox"/>                      | <input type="checkbox"/>                   | <input type="checkbox"/>     |
| [REDACTED] | <input type="checkbox"/>                   | <input type="checkbox"/>                      | <input type="checkbox"/>                   | <input type="checkbox"/>     |

Q4. Please add extra information here if you need to clarify your response

*Note that we have blanked out the names of the individual organisations for their anonymity.*
